# Supplementary material for: Cryptosporidium spp. and Giardia spp. in feces and water and the associated exposure factors on dairy farms
Source: PubMed Central journal article supplement (PMC5389815; doi:10.1371/journal.pone.0175311), 2017-04-12

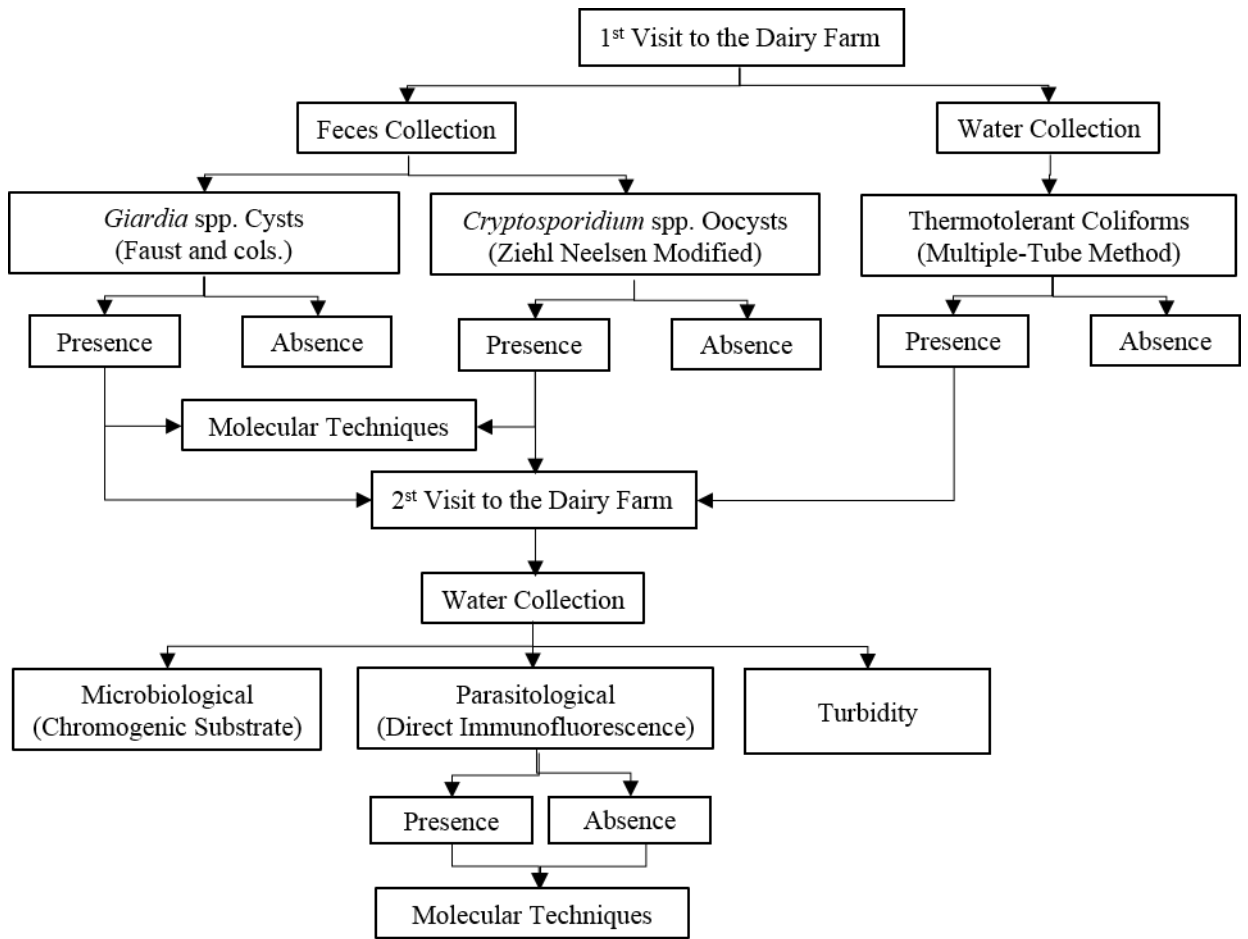

Supplement: pone.0175311.s001.pdf [file pone.0175311.s001.pdf]
